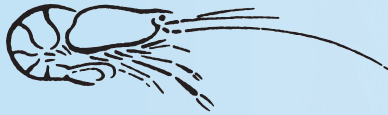

The Crustacean Society

# Journal of Crustacean Biology

*Journal of Crustacean Biology* 38(1), 101–106, 2018. doi:10.1093/jcobiol/rux089

## Effects of food concentration on the reproductive capacity of the invasive freshwater calanoid copepod *Arctodiaptomus dorsalis* (Marsh, 1907) in the Philippines

Dino T. Tordesillas<sup>1</sup>, Princess M. F. Paredes<sup>2</sup>, Kyle P. E. Villaruel<sup>2</sup>, Clarisse A. A. M. Queneri<sup>2</sup>, Jennete L. Rico<sup>2</sup>, Syuhei Ban<sup>4</sup> and Rey D. S. Papa<sup>1,2,3</sup>

<sup>1</sup>The Graduate School, University of Santo Tomas, Manila, Philippines 1015;

<sup>2</sup>Department of Biological Sciences, University of Santo Tomas, Manila, Philippines 1015;

<sup>3</sup>Research Center for the Natural and Applied Sciences, University of Santo Tomas, Manila, Philippines 1015; and

<sup>4</sup>Department of Ecosystem Studies, School of Environmental Science, University of Shiga Prefecture, Hikone, Shiga, Japan 522–8533

Correspondence: D. Tordesillas; e-mail: [dinotordesillas@gmail.com](mailto:dinotordesillas@gmail.com)

(Received 11 February 2017; accepted 6 September 2017)

### ABSTRACT

The relationship between food concentration and reproductive capability has been reported for many copepods. Such information can indirectly provide insight as to how species invade new habitats. *Arctodiaptomus dorsalis* (Marsh, 1907), originally described from the United States, has been found to be present in more than 20 Philippine inland water bodies and has also been documented to prefer eutrophic conditions. By feeding this copepod different concentrations of *Chlamydomonas reinhardtii* Dangeard, 1888 ( $4 \times 10^3$  cells ml<sup>-1</sup>,  $5 \times 10^4$  cells ml<sup>-1</sup>,  $10^5$  cells ml<sup>-1</sup>, and  $2 \times 10^5$  cells ml<sup>-1</sup>), we investigated the effect of food concentration on different reproductive parameters of *A. dorsalis*: hatching success (HS), clutch size (CS), latency time (LT), inter-clutch duration (ICD), egg production rate (EPR), and fecundity (F). With increasing food concentration HS varied from 13.64% to 50.74%, and CS from 8.50 to 10.57 eggs clutch<sup>-1</sup>, but these differences were not statistically significant. EPR significantly increased with food concentration from 3.00 to 7.54 eggs female<sup>-1</sup> d<sup>-1</sup>, while ICD and LT both significantly decreased from 2.00 to 1.71 d and 1.58 to 0.71 d, respectively. F significantly increased from 3.4 to 59.2 eggs female<sup>-1</sup> with increasing food concentration, with a maximum of 104 eggs in nine clutches for one individual. The spawning interval thus became shorter and clutches are produced at higher rates at high food concentrations. The successful invasion of *A. dorsalis* into the inland waters of the Philippines, therefore, could be attributed to the natural eutrophic conditions of these habitats, which has been further aggravated by anthropogenic nutrient inputs into the ecosystem.

**Key Words:** eutrophication, feeding experiments, freshwater zooplankton

### INTRODUCTION

Copepods play a crucial role in aquatic ecosystems as primary consumers providing a link between producers and higher trophic levels (Amarasinghe *et al.*, 1997; Richardson, 2008; Liu *et al.*, 2015). Copepod production, population dynamics, and life history are therefore important in investigations of lake ecosystems (Jiménez-Melero *et al.*, 2012; Liu *et al.*, 2015), as well as investigations of the environmental factors affecting their biology (Makino & Ban, 2000). Together with temperature, food concentration has been considered as one of the most important parameters affecting the

reproduction (Ban, 1994; Jiménez-Melero *et al.*, 2012; Liu *et al.*, 2015) and population growth (Sullivan & Kimmerer, 2013) of copepods.

Previous studies have shown that food concentration affects egg production (Ban, 1994; Jónasdóttir, 1994; Liu *et al.*, 2015), clutch emergence (Chaudron *et al.*, 1995; Jiménez-Melero *et al.*, 2012; Liu *et al.*, 2015) and hatching success (Chaudron *et al.*, 1995; Liu *et al.*, 2015) of copepods. Makino & Ban (2000) used different concentrations of the alga *Cryptomonas tetrapyrenoidosa* Skuja, 1948 to simulate an oligotrophic environment and observed that clutch size, egg production rate and

hatching success of *Cyclops* sp. were affected by an increase in concentration of algae from  $1 \times 10^3$  to  $4 \times 10^4$  cells  $\text{ml}^{-1}$ . Most of these studies were done on temperate copepods, and only meagre information concerns tropical species (Amarasinghe et al., 1997).

Published studies on the freshwater zooplankton in the Philippines have primarily focused on taxonomy (Papa & Briones, 2014), ecology (Papa & Zafaralla, 2011; Papa et al., 2011, 2012b), and development (Tordesillas et al., 2016). Studies on Philippine lakes focusing on trophic ecology in relation to the phytoplankton community and/or levels of chlorophyll a (Chl-a) are scant, mostly focusing on aquaculture development in major lakes (Tamayo-Zafaralla et al., 2002) such as Laguna de Bay, the largest in the country, Lake Taal, Batangas province, and the seven maar lakes of San Pablo City, Laguna province, all on the island of Luzon, and Lake Lanao on the southern island of Mindanao. Available data on these lakes include evaluations of their mesotrophic to hypereutrophic status (Tamayo-Zafaralla et al., 2002; Cuvin-Aralar et al., 2004; Baldia et al., 2007; Perez et al., 2008), measurements of their Chl-a levels ( $2 \text{ ug l}^{-1}$  to  $150.63 \text{ ug l}^{-1}$ ) (Laguna Lake Development Authority, Environmental Quality Research Division, 2008; Perez et al., 2008), and descriptions of their phytoplankton communities (Lewis, 1978; Tamayo-Zafaralla et al., 2002; Papa & Mamaril, 2011), but no information on how these factors affect the reproduction of zooplankton. Only Papa et al. (2012b) correlated Chl-a levels to zooplankton spatial abundance in Laguna de Bay, although exact figures for Chl-a were not given.

We investigated the effects of different concentrations of food on the rates of egg production, egg development, and hatching success of the calanoid copepod *Arctodiaptomus dorsalis* (Marsh, 1907) reared in the laboratory under food-limited, abundant and overabundant conditions. This copepod, described from Louisiana, USA (Marsh, 1907), and known through Central America to northern South America (Reid, 2007), was recorded in 23 out of 32 lakes, rivers and dams in the Philippines from 2011 to 2015 (Papa et al., 2012a; Metillo et al., 2014; Rizo et al., 2015; Tordesillas et al., 2016). Our study was aimed at investigating whether *A. dorsalis* could have presumably displaced calanoid copepods endemic to the Philippines (Papa et al., 2012a; Metillo et al., 2014) owing to its preference for eutrophic waters (Elmore, 1983; Reid, 2007; Papa et al., 2012b), a preference which has been observed to affect its distribution in Florida, USA (Elmore, 1983). We also add to the sparse available data on tropical copepods (Elmore, 1982; Amarasinghe et al., 1997), specifically on their reproduction, and provide information on the life history of an invasive species.

## MATERIALS AND METHODS

### Stock cultures

A mean of 20.67 adults and 73.33 in various naupliar and copepodid stages of *Arctodiaptomus dorsalis*, which had been cultivated

in the Biology Laboratory of the Thomas Aquinas Research Complex, University of Santo Tomas, Manila, Philippines since August, 2014, were grown in three 250 ml beakers containing 150 ml of sterile tap water and fed with  $\sim 1.5 \times 10^5$  cells  $\text{ml}^{-1}$  of a suspension of the green alga *Chlamydomonas reinhardtii* Dangeard, 1888 (strain NIES 2235) for four weeks prior the experiment. The stock cultures were maintained at a constant temperature of 30 °C with a photoperiod of 12L:12D with a light intensity of  $\sim 60$  lux using a cool-white fluorescent tube shaded with a sheet of blue cellophane. The culture medium was replaced, and moults and dead individuals were removed every two days.

### Experimental procedure

A mono-algal diet of *C. reinhardtii* was used as food at concentrations of approximately  $4 \times 10^3$  cells  $\text{ml}^{-1}$ ,  $5 \times 10^4$  cells  $\text{ml}^{-1}$ ,  $10^5$  cells  $\text{ml}^{-1}$  and  $2 \times 10^5$  cells  $\text{ml}^{-1}$ . Concentrations were measured using a hemocytometer. The lowest concentration represents an oligotrophic condition (Makino & Ban, 2000), and the last three represent different levels of eutrophic conditions (Gastrich et al., 2004). Male/female pairs in the fifth copepodite stage were isolated from the stock culture and placed in a 5 ml well of a tissue culture plate with 4 ml of algal suspension. No acclimation was done following Chow-Fraser & Sprules (1992) and Gentleman & Neuheimer (2008). Five pairs of copepods were observed for each experimental food concentration. All setups were maintained at the same temperature and light conditions as those of the stock culture. The culture medium was replaced with fresh algal suspension every other day. Spawning and number of newly hatched nauplii were recorded every day using stereoscopic (Swift SM90) and compound (Olympus CX21) microscopes for twelve days from the first clutch of eggs spawned (modified from Jeyaraj & Santhanam, 2013). Dead males were replaced with live ones whenever found.

### Reproductive parameters

The following parameters were observed: hatching success (HS), the percentage of successfully hatched nauplii from each clutch; clutch size (CS), the total number of eggs in a particular clutch produced by an ovigerous female; latency time (LT), the number of days between the hatching of a clutch of eggs and the spawning of the next clutch; inter-clutch duration (ICD), the time interval between the spawnings of two consecutive clutches; and egg-production rate (EPR), the number of eggs produced by each female per day determined using the quotient CS/ICD for each clutch of each individual. Nauplii that emerged within three days of the first hatching per clutch were fixed with 70% ethanol and stained with Rose Bengal for counting (based on a modification of Ask et al., 2006). The fecundity (F) of a female was quantified as the total number of eggs it produced during the study period.

**Table 1.** Mean and standard deviations (SD) of reproductive parameters in *Arctodiaptomus dorsalis* reared under four different food concentrations; CS, clutch size (eggs clutch<sup>-1</sup>); LT, latency time (days) (\* no data for the  $4.0 \times 10^3$  food concentration); HS, hatching success (%); ICD, inter-clutch duration (days); EPR, egg production rate (eggs female<sup>-1</sup> day<sup>-1</sup>).

| Parameters   | Food concentration (cells $\text{ml}^{-1}$ ) |      |    |                 |      |     |        |      |     |                 |      |     |
|--------------|----------------------------------------------|------|----|-----------------|------|-----|--------|------|-----|-----------------|------|-----|
|              | $4 \times 10^3$                              |      |    | $5 \times 10^4$ |      |     | $10^5$ |      |     | $2 \times 10^5$ |      |     |
|              | Mean                                         | SD   | N  | Mean            | SD   | N   | Mean   | SD   | N   | Mean            | SD   | N   |
| No. of pairs |                                              |      | 1  |                 |      | 4   |        |      | 5   |                 |      | 4   |
| HS (%)       | 13.64                                        |      | 17 | 39.67           |      | 149 | 44.60  |      | 154 | 50.74           |      | 296 |
| CS           | 8.50                                         | 2.50 | 2  | 9.31            | 3.33 | 16  | 8.11   | 4.52 | 19  | 10.57           | 3.13 | 28  |
| EPR          | 3.00                                         | 0.00 | 1  | 3.83            | 2.54 | 12  | 5.33   | 3.59 | 15  | 7.54            | 4.17 | 24  |
| ICD          | 2.00                                         | 0.00 | 1  | 2.92            | 1.38 | 12  | 2.20   | 1.33 | 15  | 1.71            | 0.73 | 24  |
| LT           | –                                            | –    | –  | 1.58            | 1.08 | 12  | 1.10   | 0.69 | 15  | 0.71            | 0.35 | 24  |

Statistical analyses

Significant differences in each reproductive parameter (CS, HS, EPR, ICD, and LT) among the food concentrations were analysed with a Kruskal-Wallis test, followed by a post-hoc Dunn's method, when the results of the Kruskal-Wallis test indicated a significant difference. Values for F were tested using a one-way ANOVA with a post hoc Tukey's pairwise test. All statistical analyses were made using SigmaPlot (Version 13.0, Systat Software, San Jose, CA, USA; [www.systatsoftware.com](http://www.systatsoftware.com)).

RESULTS

The effects of food concentration on the reproductive parameters of *A. dorsalis* are summarized in Table 1. HS varied from 13.64% to 50.74%, and CS from 8.50 to 10.57 eggs clutch<sup>-1</sup>. Although

increasing trends were found in both HS and CS (Fig. 1A, 1B), Kruskal-Wallis tests showed no significant differences for both parameters among food concentrations (Table 2).

For EPR, ICD and LT, only data from the food concentrations of  $5 \times 10^4$ ,  $10^5$ , and  $2 \times 10^5$  cells ml<sup>-1</sup> (Fig. 1) were analysed because only one individual was able to produce eggs at the  $4 \times 10^3$  cells ml<sup>-1</sup> concentration. EPR increased from 3.83 to 7.54 eggs d<sup>-1</sup> with increasing food concentration (Fig. 1C), and the difference was statistically significant (Table 2) between food concentrations of  $5 \times 10^4$  and  $2 \times 10^5$  cells ml<sup>-1</sup> (Dunn's method  $Q = 2.96, p < 0.05$ ).

There was a significant decrease in ICD (Fig. 1D), from 2.92 to 1.71 d, with food concentration (Table 2). The period between the hatching of the eggs in a clutch and the spawning of the next clutch of eggs especially shortened between the  $5 \times 10^4$  and  $2 \times 10^5$  cells ml<sup>-1</sup> food concentrations ( $Q = 2.26, P < 0.05$ ).

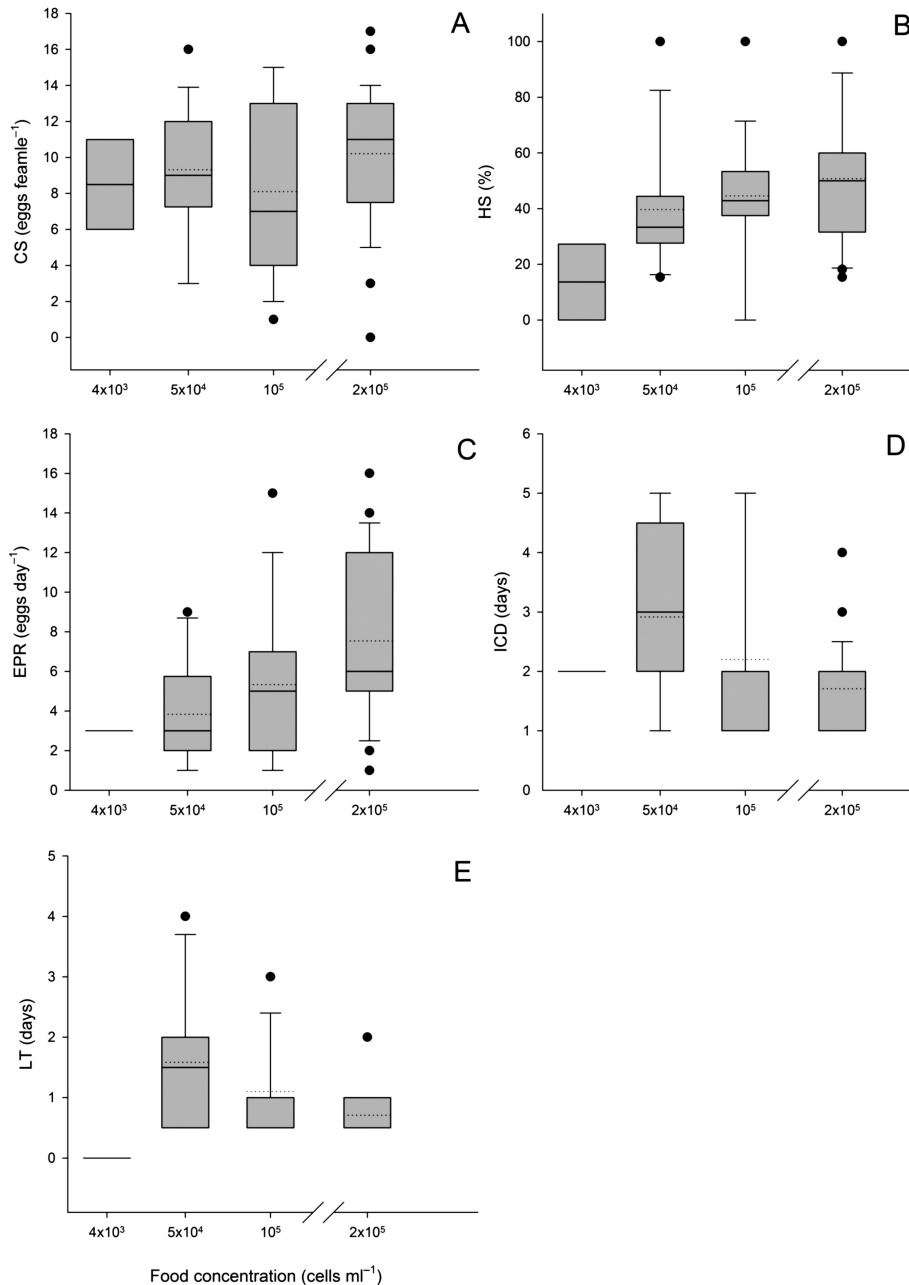

**Figure 1.** Reproductive parameters of *Arctodiaptomus dorsalis* maintained in increasing food concentrations (cells ml<sup>-1</sup>) at constant temperature of 30 °C. Dotted lines represent mean values, solid lines median values. Only one individual successfully produced clutches at the lowest food concentration (C, D, and E).

A significant decrease from 1.58 to 0.71 d was also observed for LT (Table 2, Fig. 1E), with the most substantial difference occurring between concentrations of  $5 \times 10^4$  and  $2 \times 10^5$  cells ml<sup>-1</sup> ( $Q = 2.47$ ,  $P < 0.05$ ).

The mean fecundity (F) of *A. dorsalis* steadily increased from 3.4 to 59.2 eggs female<sup>-1</sup> with increasing food concentration (Fig. 2), reaching a maximum of 104 eggs produced in nine clutches for one individual fed on  $2 \times 10^5$  cells ml<sup>-1</sup>. There was a significant difference among the *Chlamydomonas* concentrations (ANOVA,  $df = 19$ ,  $F = 3.242$ ,  $P < 0.05$ ), particularly between the  $4 \times 10^3$  and  $2 \times 10^5$  cells ml<sup>-1</sup> concentrations (Tukey's Pairwise Test,  $q = 4.408$ ,  $P < 0.05$ ). Only one female produced eggs at the lowest food concentration.

## DISCUSSION

*Arctodiaptomus dorsalis* produced more eggs per day at shorter intervals at higher food concentrations. This sharp increase in mean fecundity is the result of more eggs being produced at higher food concentrations, despite the sizeable but statistically insignificant variation in clutch size. These results suggest that oocyte maturation and subsequent egg production of *A. dorsalis* was positively

**Table 2.** Kruskal-Wallis test results on the different reproductive parameters measured in the rearing of *Arctodiaptomus dorsalis* under four different food concentrations. No significant differences were found for egg production rate (EPR), inter-clutch duration (ICD), and latency time (LT) at  $4 \times 10^3$  cells ml<sup>-1</sup> because only one individual was able to produce clutches, and was only able to do so twice. Multiple comparison tests using Dunn's method showed significant difference between  $5 \times 10^4$  and  $2 \times 10^5$  for EPR, ICD, and LT. CS, clutch size; HS, hatching success (%).

| Parameters | df.  | H    | P      |
|------------|------|------|--------|
| CS         | 3.00 | 4.03 | > 0.05 |
| HS         | 3.00 | 7.76 | > 0.05 |
| EPR*       | 2.00 | 7.14 | 0.03   |
| ICD*       | 2.00 | 7.19 | 0.03   |
| LT*        | 2.00 | 8.39 | 0.01   |

\*Significant difference at < 0.05 level

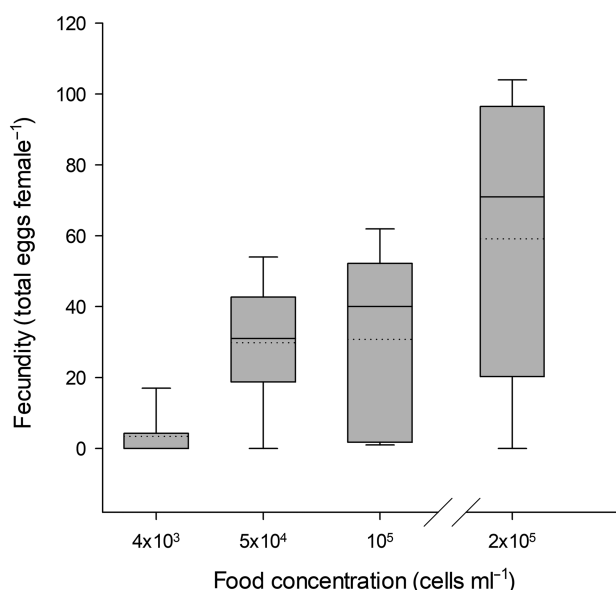

**Figure 2.** Fecundity of *Arctodiaptomus dorsalis* in increasing food concentrations. Dotted lines represent mean values; solid lines represent median values.

affected by food concentration, in agreement with previous studies on other planktonic copepods (Uye, 1981; Ban, 1994; Hirche et al., 1997; Ohs et al., 2010; Jiménez-Melero et al., 2012; Jeyaraj & Santhanam, 2013; Liu et al., 2015). Elmore (1983) suggested that at the most inadequate food levels, *A. dorsalis* was unable to reproduce. We observed such a situation at the  $4 \times 10^3$  cells ml<sup>-1</sup> concentration and suggest that this is the approximate low incipient limiting concentration for successful reproduction in this species. Furthermore, since egg production incurs a significant energy cost (Jónasdóttir, 1994), females may require more time to feed during conditions of low food concentration in order to save enough energy for reproduction (Jiménez-Melero et al., 2012).

Clutch size was not significantly affected by the concentration of food, contrary to studies on other planktonic crustaceans (Hopcroft & Roff, 1996; Amarasinghe et al., 1997; Liu et al., 2015). A decrease in clutch size under low food concentration has been observed in *Arctodiaptomus salinus* (Daday de Deés, 1885) (Jiménez-Melero et al., 2012). The clutch sizes of *A. dorsalis* we observed were considerably smaller than those reported by Elmore (1983), even though the algal food used was the same, and concentrations of  $10^5$  cells ml<sup>-1</sup> and  $2 \times 10^5$  cells ml<sup>-1</sup> were beyond the incipient limiting concentration. The surprisingly slight increase in hatching success when compared to that of other copepods (Irigoin et al., 2002; Ask et al., 2006) could be due to the direct relationship of this reproductive parameter with temperature (Tordesillas et al., 2016).

The presence of *Chlamydomonas* in Philippine lakes such as Laguna de Bay (Tamayo-Zafaralla et al., 2002; Cuvín-Aralar et al., 2004), Lake Taal (Perez et al., 2008; Papa & Mamaril, 2011), and Lake Lanao (Lewis, 1978) has been well documented, suggesting that this alga is available as a food source for *A. dorsalis* in these lakes, where the copepod has also been reported (Tuyor & Baay, 2001; Papa et al., 2012a, 2012c; Metillo et al., 2014). Although *C. reinhardtii* has been used as food for the culture of *A. dorsalis* in previous studies (Elmore, 1982, 1983; Tordesillas et al., 2016), the nutrient quality of mixtures of different species of algae have been regarded as better for the culture of copepods (Støttrup, 2006; Jeyaraj & Santhanam, 2013) and to have positive effects on clutch size (Jónasdóttir, 1994), hatching success (Guisande & Harris, 1995), egg-production rate (Makino & Ban, 2000), and inter-clutch duration (Caramujo & Boavida, 1999). The nutrient content of algal food should be considered in any future studies since it can be a limiting factor in the reproduction of copepods (Jónasdóttir, 1994; Chaudron et al., 1995; Koski & Kuosa, 1999), and could affect the results of laboratory experiments.

Our relatively limited knowledge of the reproduction of tropical calanoid copepods (Elmore, 1982; Amarasinghe et al., 1997) makes it difficult to make comparisons with similar species, most especially from southeastern Asia. But based on the study by Papa (2012a) lakes formerly occupied by Philippine endemic calanoids such as *Filipinodiaptomus insulanus* (Wright, 1928) and *Tropodiaptomus* spp. have been replaced by *A. dorsalis*, it seems that eutrophication plays a role, as observed by Elmore (1983). Because there is no knowledge of the feeding and adaptations to eutrophication of endemic species of calanoid copepods, it is still unclear whether the increase in algal densities gave *A. dorsalis* an advantage over endemics in terms of reproductive potential, or proved to be a disadvantage to oligotrophic to mesotrophic endemics, allowing *A. dorsalis* to occupy vacated niches. Nevertheless, the naturally eutrophic waters of Philippine lakes (Ong et al., 2002), with nutrient input from anthropogenic sources (Metin, 2005), could have provided the right food conditions for *A. dorsalis* to successfully establish populations in Philippine inland waters and for its spread throughout the country.

## ACKNOWLEDGEMENTS

This work was supported by a Partnerships for Enhanced Engagement in Research (PEER) Science Grant awarded by the

US National Academy of Sciences and USAID (Sub Grant PGA-2000004881; AID-OAA-A-11-00012 2014-2016) to RDSP. This research was conducted under a Memorandum of Understanding between the University of Santo Tomas and the University of Shiga Prefecture. DTT was supported by a Philippine Department of Science and Technology-Accelerated Science and Technology Human Resource Development Program (DOST-ASTHRDP) Scholarship Grant. The authors would also like to thank the anonymous reviewers for their invaluable input, which much improved the manuscript.

## REFERENCES

- Amarasinghe, P.B., Boersma, M., and Vijverberg, J. 1997. The effect of temperature, and food quantity and quality on the growth and development rates in laboratory-cultured copepods and cladocerans from a Sri Lankan reservoir. *Hydrobiologia*, **350**: 131–144.
- Ask, J., Reinikainen, M., and Bämstedt, U. 2006. Variation in hatching success and egg production of *Eurytemora affinis* (Calanoida, Copepoda) from the Gulf of Bothnia, Baltic Sea, in relation to abundance and clonal differences of diatoms. *Journal of Plankton Research*, **28**: 683–694.
- Baldia, S.F., Evangelista, A.D., Aralar, E.V. & Santiago, A.E. 2007. Nitrogen and phosphorus utilization in the cyanobacterium *Microcystis aeruginosa* isolated from Laguna de Bay, Philippines. *Journal of Applied Phycology*, **19**: 607–613.
- Ban, S. 1994. Effect of temperature and food concentration on post-embryonic development, egg production and adult body size of calanoid copepod *Eurytemora affinis*. *Journal of Plankton Research*, **16**: 721–735.
- Caramujo, M. & Boavida, M. 1999. Characteristics of the reproductive cycles and development times of *Copidodiaptomus numidicus* (Copepoda: Calanoida) and *Acanthocyclops robustus* (Copepoda: Cyclopoida). *Journal of Plankton Research*, **21**: 1765–1778.
- Chaudron, Y., Poulet, S.A., Laabir, M., Ianora, A. & Miralto, A. 1995. Is hatching success of copepod eggs diatom density dependent? *Marine Ecology Progress Series*, **144**: 185–193.
- Chow-Fraser, P. & Sprules, W.G. 1992. Type-3 functional response in limnetic suspension-feeders, as demonstrated by in situ grazing rates. *Hydrobiologia*, **232**: 175–191.
- Cuvin-Aralar, M.L., Focken, U., Becker, K. & Aralar, E.V. 2004. Effects of low nitrogen-phosphorus ratios in the phytoplankton community in Laguna de Bay, a shallow eutrophic lake in the Philippines. *Aquatic Ecology* **38**: 387–401.
- Daday de Deés, E. 1885. Adatok Magyar és Erdélyország néhány édesvízi medencéjének nyíltükri faunájához. *Orvos-Természettudományi Értesítő*, **7**: 227–250.
- Elmore, J.L. 1982. The influence of food concentration and container volume on life history parameters of *Diaptomus dorsalis* Marsh from subtropical Florida. *Hydrobiologia*, **223**: 215–223.
- Elmore, J.L. 1983. Factors influencing *Diaptomus* distribution: An experimental study in subtropical Florida. *Limnology and Oceanography*, **28**: 522–532.
- Gastrich, M.D., Leigh-Bell, J.A., Gobler, C.J., Roger Anderson, O., Wilhelm, S.W. & Bryan, M. 2004. Viruses as potential regulators of regional brown tide blooms caused by the alga, *Aureococcus anophagefferens*. *Estuaries*, **27**: 112–119.
- Gentleman, W.C. & Neuheimer, A.B. 2008. Functional responses and ecosystem dynamics: how clearance rates explain the influence of saturation, food-limitation and acclimation. *Journal of Plankton Research*. **30**: 1215–1231.
- Guisande, C. & Harris, R. 1995. Effect of total organic content of eggs on hatching success and naupliar survival in the copepod *Calanus helgolandicus*. *Limnology and Oceanography*, **40**: 476–482.
- Hirche, H.J., Meyer, U. & Niehoff, B. 1997. Egg production of *Calanus finmarchicus*: Effect of temperature, food and season. *Marine Biology*, **127**: 609–620.
- Hopcroft, R.R. & Roff, J.C. 1996. Zooplankton growth rates: diel egg production in the copepods *Oithona*, *Euterpina* and *Corycaeus* from tropical waters. *Journal of Plankton Research*, **18**: 789–803.
- Irigoin, X., Harris, R.P., Verheye, H.M., Joly, P., Runge, J., Starr, M., Pond, D., Campbell, R., Shreeve, R., Ward, P., Smith, A.N., Dam, H.G., Peterson, W., Tirelli, V., Koski, M., Smith, T., Harbour, D. & Davidson, R. 2002. Copepod hatching success in marine ecosystems with high diatom concentrations. *Nature*, **419**: 387–389.
- Jeyaraj, N. & Santhanam, P. 2013. Influence of algal diet on population density, egg production and hatching succession of the calanoid copepod, *Paracalanus parvus* (Claus, 1863). *Journal of Algal Biomass Utilization*, **4**: 1–8.
- Jiménez-Melero, R., Parra, G. & Guerrero, F. 2012. Effect of temperature, food and individual variability on the embryonic development time and fecundity of *Arctodiaptomus salinus* (Copepoda: Calanoida) from a shallow saline pond. *Hydrobiologia*, **686**: 241–256.
- Jónasdóttir, S.H. 1994. Effects of food quality on the reproductive success of *Acartia tonsa* and *Acartia hudsonica*: laboratory observations. *Marine Biology*, **121**: 67–81.
- Koski, M. & Kuosa, H. 1999. The effect of temperature, food concentration and female size on the egg production of the planktonic copepod *Acartia bifilosa*. *Journal of Plankton Research*, **21**: 1779–1789.
- Laguna Lake Development Authority, Environmental Quality Research Division. 2008. *Water quality report of the Seven Crater Lakes 2006–2008*. Taytay, Rizal, Philippines.
- Lewis, W.M. Jr. 1978. A compositional, phytogeographical and elementary structural analysis of the phytoplankton in a tropical lake: Lake Lanao, Philippines. *Journal of Ecology*, **66**: 213–226.
- Liu, X., Beyrend, D., Dur, G. & Ban, S. 2015. Combined effects of temperature and food concentration on growth and reproduction of *Eodiaptomus japonicus* (Copepoda: Calanoida) from Lake Biwa (Japan). *Freshwater Biology*, **60**: 2003–2018.
- Makino, W. & Ban, S. 2000. Response of life history traits to food conditions in a cyclopoid copepod from an oligotrophic environment. *Limnology and Oceanography*, **45**: 396–407.
- Marsh, C.D. 1907. A revision of the North American species of *Diaptomus*. *Transactions of the Wisconsin Academy of Sciences, Arts and Letters*, **15**: 381–516.
- Metillo, E.B., Masorong, A.M., Macabangkit, S.A.N., Licayan, J.R.U., Tordesillas, D.T. & Papa, R.D.S. 2014. First record of the invasive *Arctodiaptomus dorsalis* (Marsh, 1907) (Copepoda: Calanoida: Diaptomidae) in Lake Lanao (Mindanao Is., Philippines). *Acta Manilana*, **62**: 19–23.
- Metin, R. 2005. Policy Issues on Lake Management in the Philippines. In: *Proceedings of the First National Congress on Philippine Lakes* (M. L. Cuvin-Aralar, R. S. Punongbayan, A. Santos-Borja, L. V. Castillo, E. V. Manalili & M. M. Mendoza, eds.), pp. 126–128. Southeast Asian Regional Center for Graduate Study and Research in Agriculture, Los Baños, Laguna, Philippines.
- Ohs, C.L., Chang, K.L., Grabe, S.W., Dimaggio, M.A. & Stenn, E. 2010. Evaluation of dietary microalgae for culture of the calanoid copepod *Pseudodiaptomus pelagicus*. *Aquaculture*, **307**: 225–232.
- Ong, P., Afuang, L. & Rosell-Ambal, R. (eds.). 2002. *Philippine biodiversity conservation priorities: a second iteration of the national biodiversity strategy and action plan*. Department of Environment and Natural Resources, Quezon City, Philippines.
- Papa, R.D.S. & Briones, J.C.A. 2014. Climate and human-induced changes to lake ecosystems: What we can learn from monitoring zooplankton ecology. *Journal of Environmental Science and Management*, **17**: 60–67.
- Papa, R.D.S. & Mamaril, A.C. Sr. 2011. History of the biodiversity and limno-ecological studies on Lake Taal with notes on the current state of Philippine limnology. *Philippine Science Letters*, **4**: 1–10.
- Papa, R.D.S. & Zafaralla, M.T. 2011. The composition, diversity and community dynamics of limnetic zooplankton in a tropical caldera lake (Lake Taal, Philippines). *Raffles Bulletin of Zoology*, **59**: 2–7.
- Papa, R.D.S., Li, H., Tordesillas, D.T., Han, B. & Dumont, H.J. 2012a. Massive invasion of *Arctodiaptomus dorsalis* (Copepoda, Calanoida, Diaptomidae) in Philippine lakes: A threat to Asian zooplankton biodiversity? *Biological Invasions*, **14**: 2471–2478.
- Papa, R.D.S., Tordesillas, D.T., Vitug, L.D., Briones, J.C.A., Zafaralla, M.T. & Kada, R. 2012b. Zooplankton spatial abundance and distribution in the West Bay of Laguna de Bay (Philippines) with notes on potential implications to food and health security. *Acta Manilana*, **60**: 67–75.
- Papa, R.D.S., Tordesillas, D.T. & Mamaril, A.C. Sr. 2012c. An updated taxonomic account of limnetic crustacean zooplankton in Lake Taal, Philippines. *Philippine Journal of Science*, **141**: 243–252.
- Papa, R.D.S., Zafaralla, M.T. & Eckmann, R. 2011. Spatio-temporal variation of the zooplankton community in a tropical caldera lake with intensive aquaculture (Lake Taal, Philippines). *Hydrobiologia*, **664**: 119–133.
- Perez, T., Enriquez, E.E., Guerrero, R.D. III, Simon, D. & Schiemer, F. 2008. Catchment characteristics, hydrology, limnology and

- socio-economic features of Lake Taal Philippines. In: *Aquatic ecosystems and development: comparative Asian perspectives* (F. Schiemer, D. Simon, U. S. Amarasinghe & J. Moreau, eds.), pp. 63–79. Backhuys/Markgraf, Leiden/Weikersheim.
- Reid, J.W. 2007. *Arctodiaptomus dorsalis* (Marsh): A case history of copepod dispersal. *Banisteria*, **1860**: 3–18.
- Richardson, A.J. 2008. In hot water: Zooplankton and climate change. *ICES Journal of Marine Science*, **65**: 279–295.
- Rizo, E.Z.C., Pascual, J.A.F., Dy, D.J.B., Labicane, L.J.A., Trinidad, C.B. & Papa, R.D.S. 2015. New records of an invasive calanoid copepod, *Arctodiaptomus dorsalis* (Marsh, 1907) in freshwater ecosystems in the Bicol Peninsula (Luzon Is., Philippines). *International Journal of Philippine Science and Technology*, **1**: 27–30.
- Støttrup, J.G. 2006. A review on the status and progress in rearing copepods for marine larviculture. advantages and disadvantages. among calanoid, harpacticoid and cyclopoid copepods. In: *Memorias del Octavo Simposium Internacional de Nutrición Acuicola*, pp. 62–83. Monterrey, Mexico.
- Sullivan, L.J. & Kimmerer, W.J. 2013. Egg development times of *Eurytemora affinis* and *Pseudodiaptomus forbesi* (Copepoda, Calanoida) from the upper San Francisco Estuary with notes on methods. *Journal of Plankton Research*, **35**: 1331–1338.
- Tamayo-Zafaralla, M., Santos, R.A.V., Orozco, R.P. & Elegado, G.C.P. 2002. The ecological status of Lake Laguna de Bay, Philippines. *Aquatic Ecosystem Health & Management*, **5**: 127–138.
- Tordesillas, D.T., Abaya, N.K.P., Dayo, M.A.S., Marquez, L.E.B., Papa, R.D.S. & Ban, S. 2016. Effect of temperature on life history traits of the invasive calanoid copepod *Arctodiaptomus dorsalis* (Marsh, 1907) from Lake Taal, Philippines. *Plankton and Benthos Research*, **11**: 105–111.
- Tuyor, J. & Baay, M. 2001. Contribution to the knowledge of freshwater copepods of the Philippines. *Asian International Journal of Life Sciences*, **10**: 45–54.
- Uye, S. 1981. Fecundity studies of neritic calanoid copepods *Acartia clausi* Giesbrecht and *A. steueri* Smirnov: A simple empirical model of daily egg production. *Journal of Experimental Marine Biology and Ecology*, **50**: 255–271.
- Wright, S. 1928. A new species of *Diaptomus* from the Philippine Islands. *Transactions of the Wisconsin Academy of Sciences, Arts and Letters*, **23**: 583–585.
